# Supplementary material for: Tras los pasos de los-- dioses de Egipto
Source: eLife journal article supplement (doi:10.7554/elife.64872), 2003-01-01

# 7,8-DHF: Control (0)

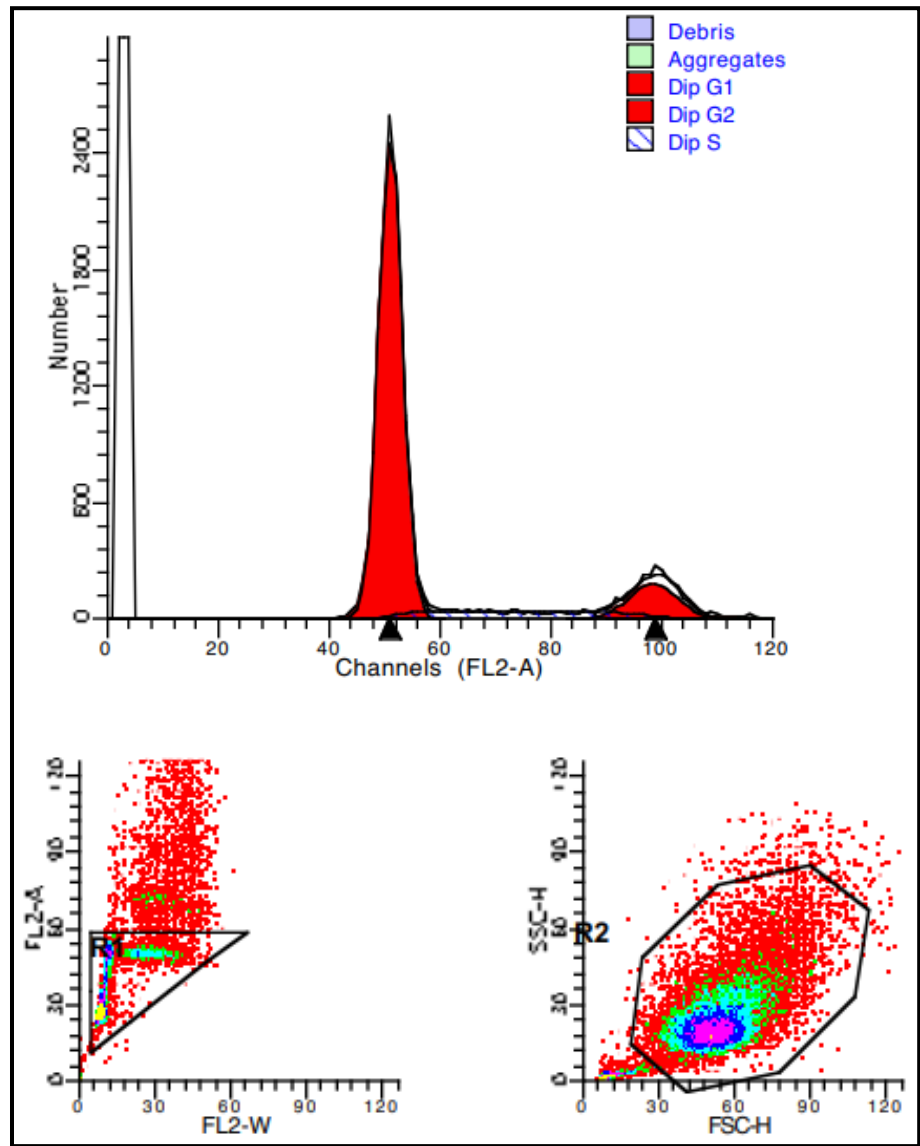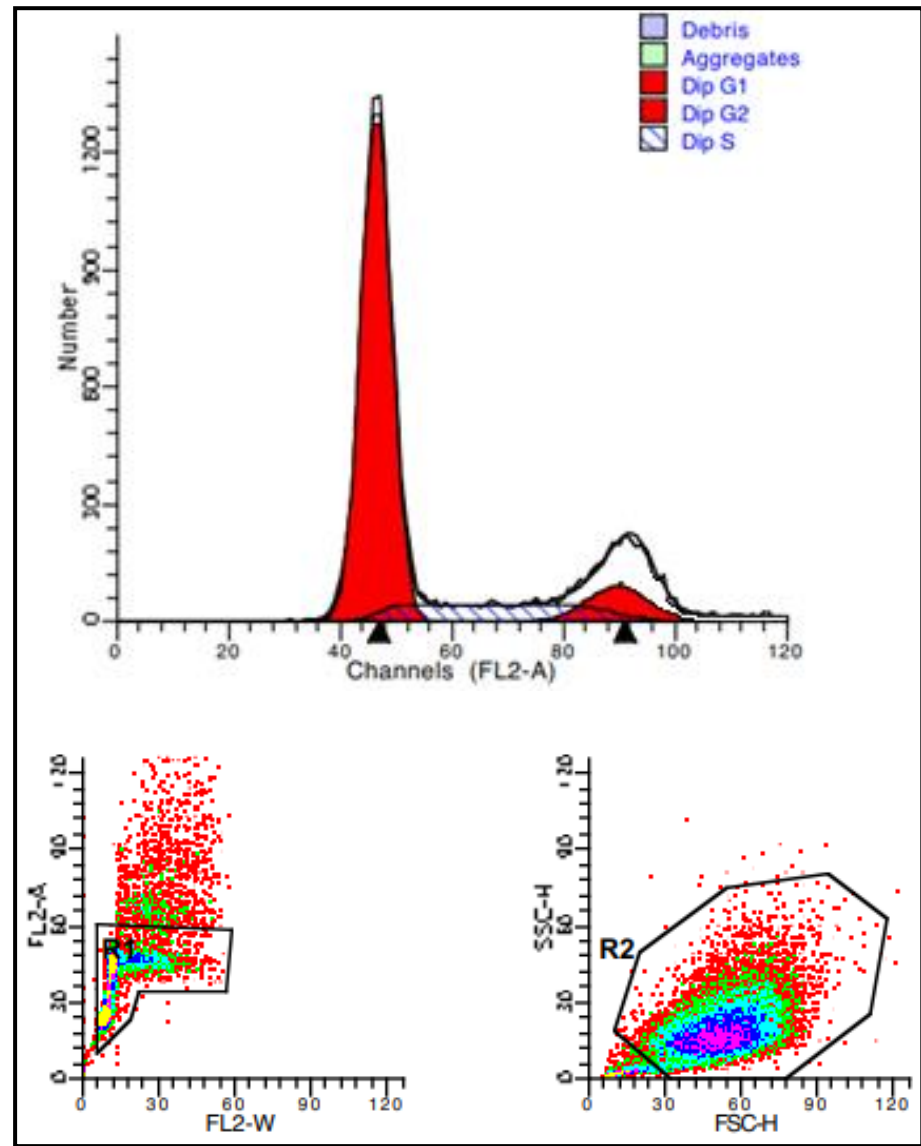

# 7,8-DHF: 0.5 $\mu$ M

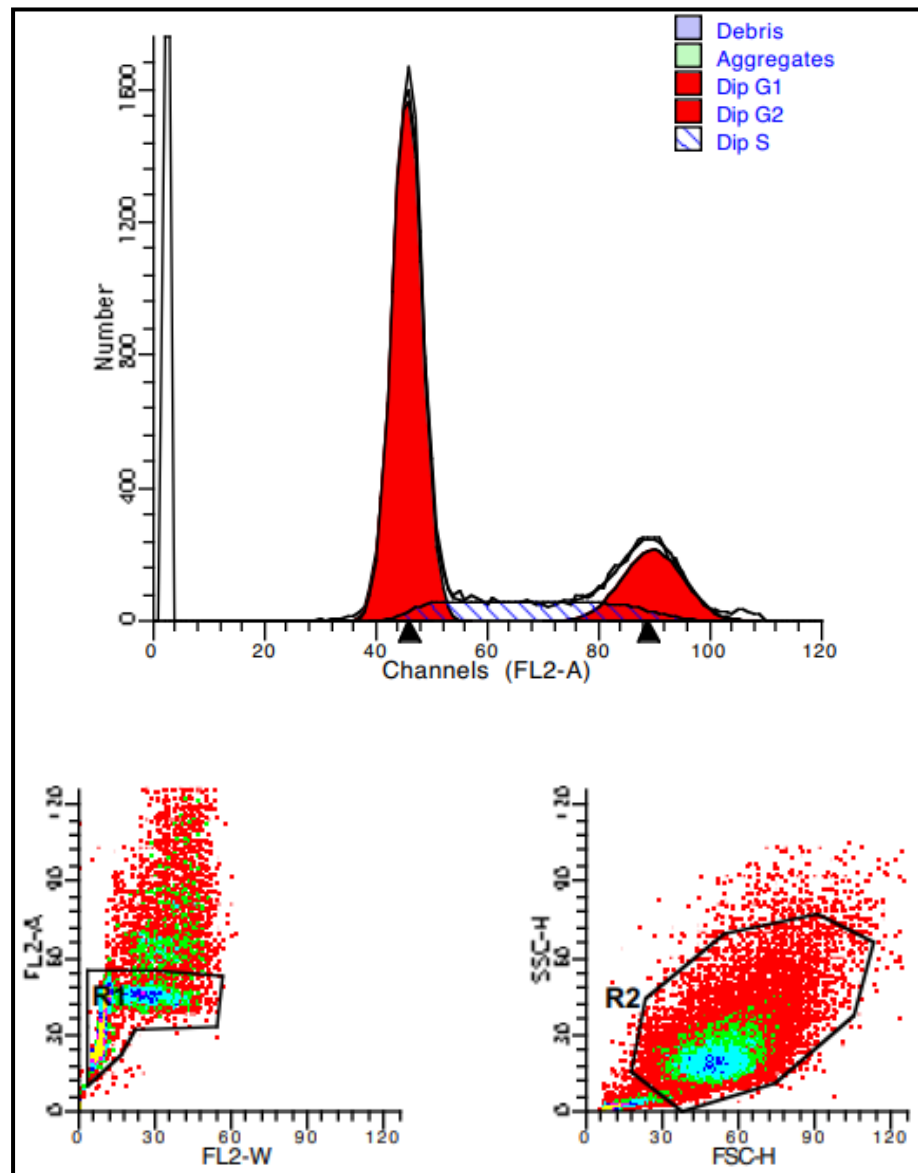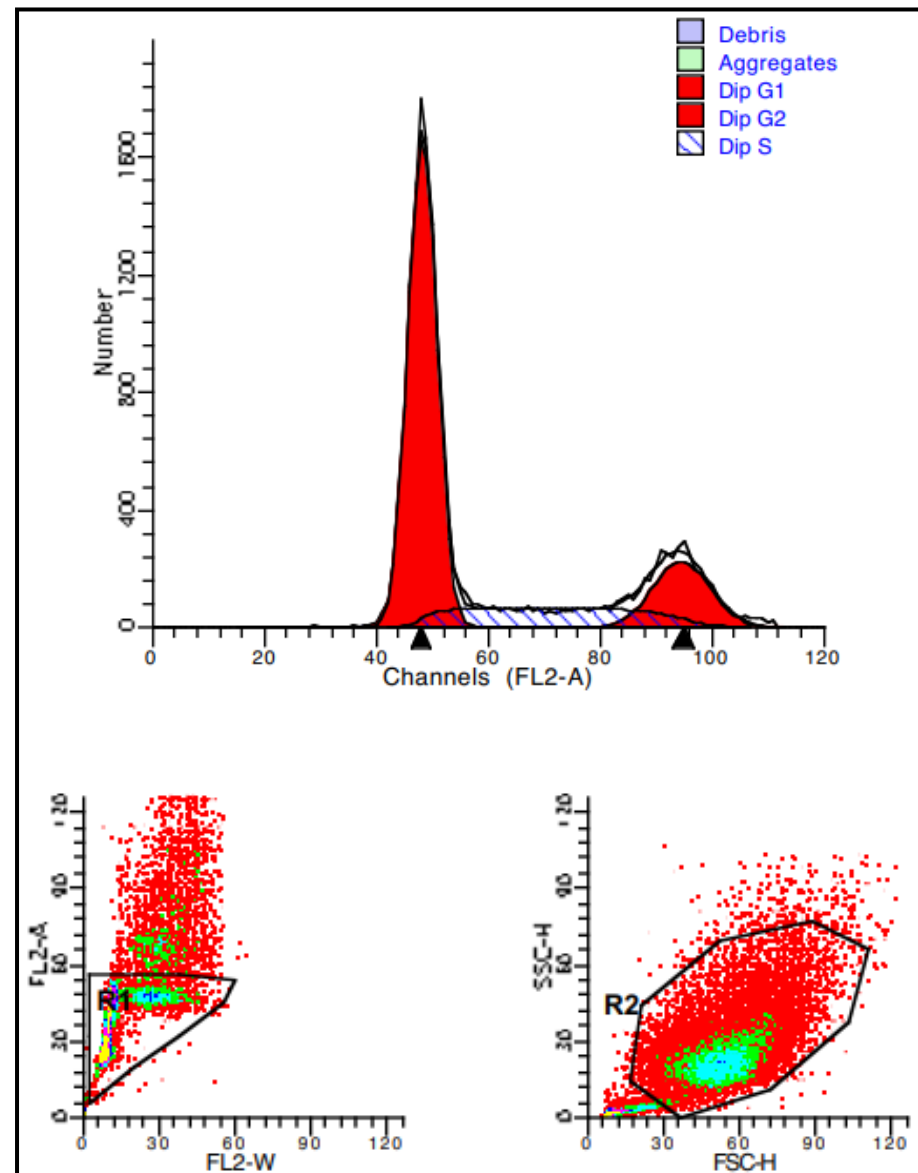

# 7,8-DHF: 1 $\mu$ M

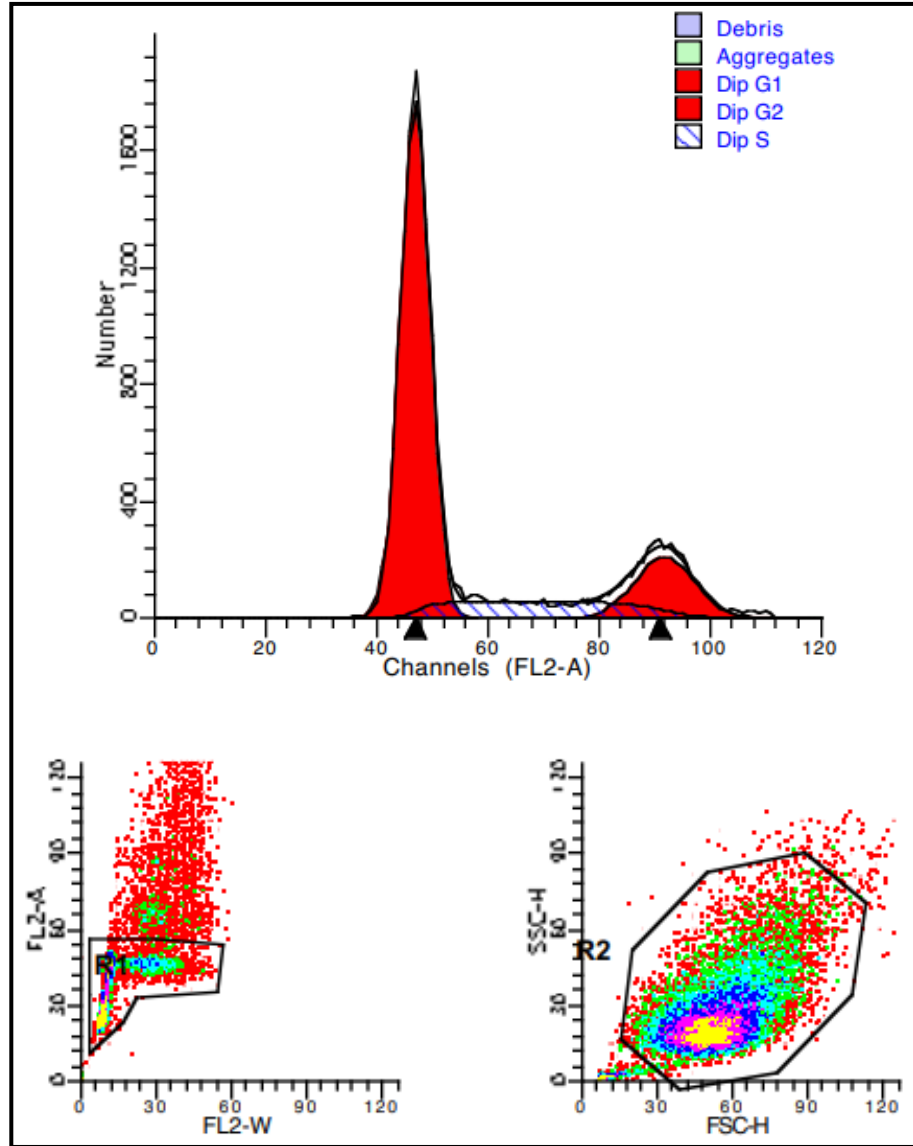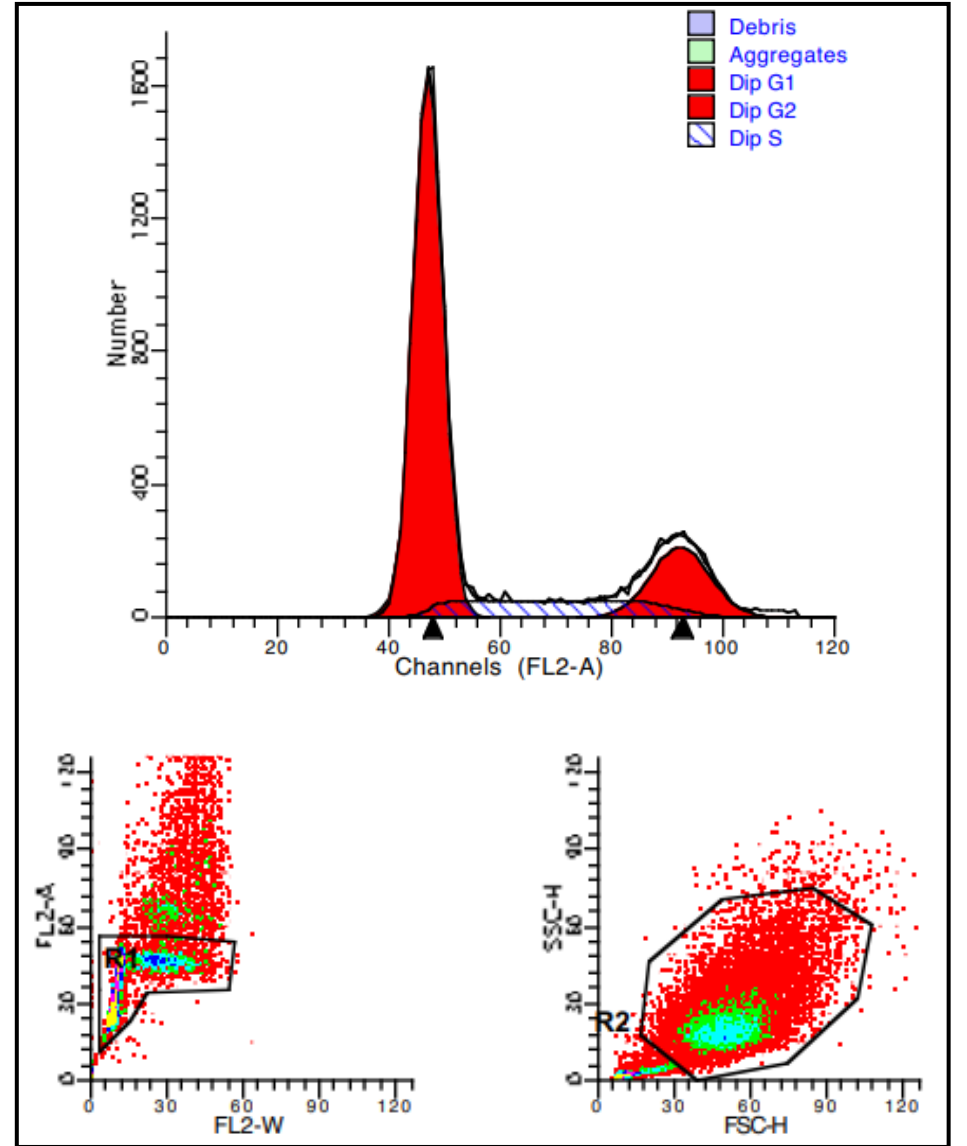

# 7,8-DHF: 5 $\mu$ M

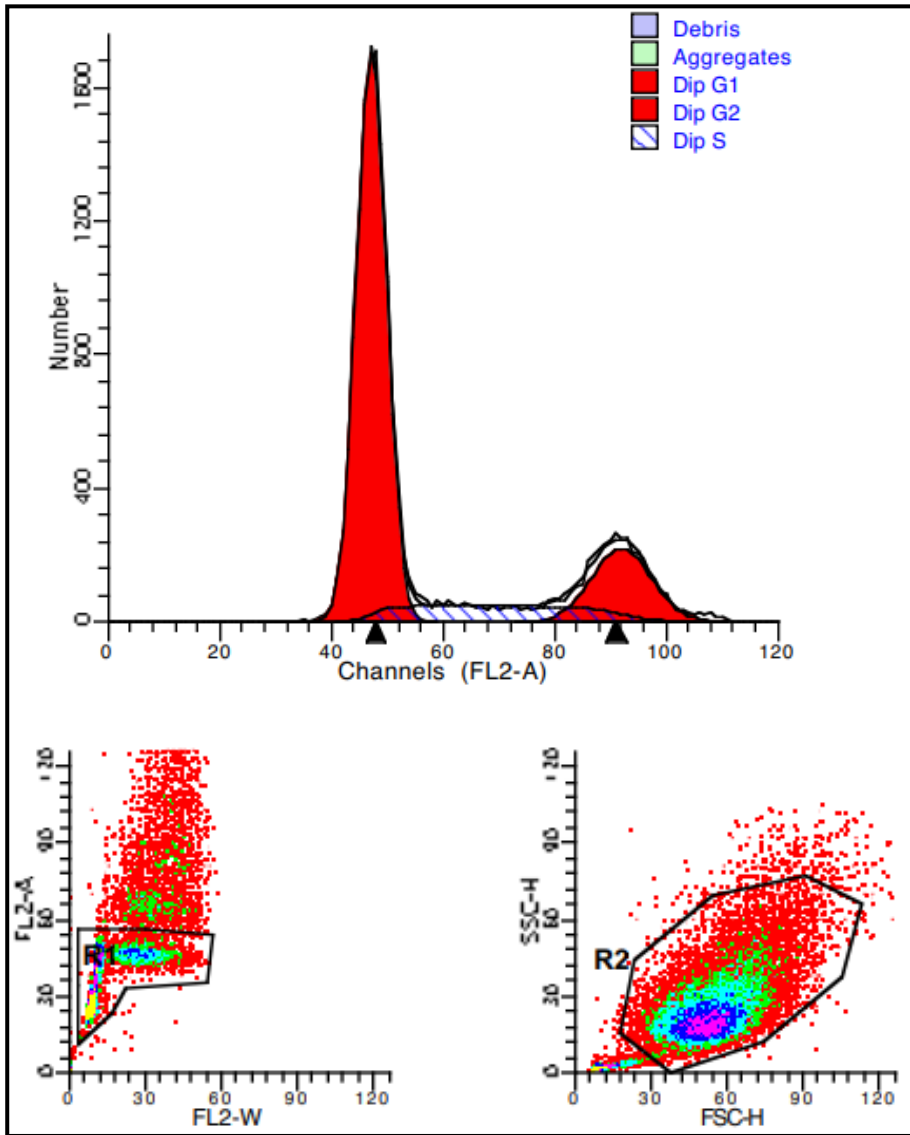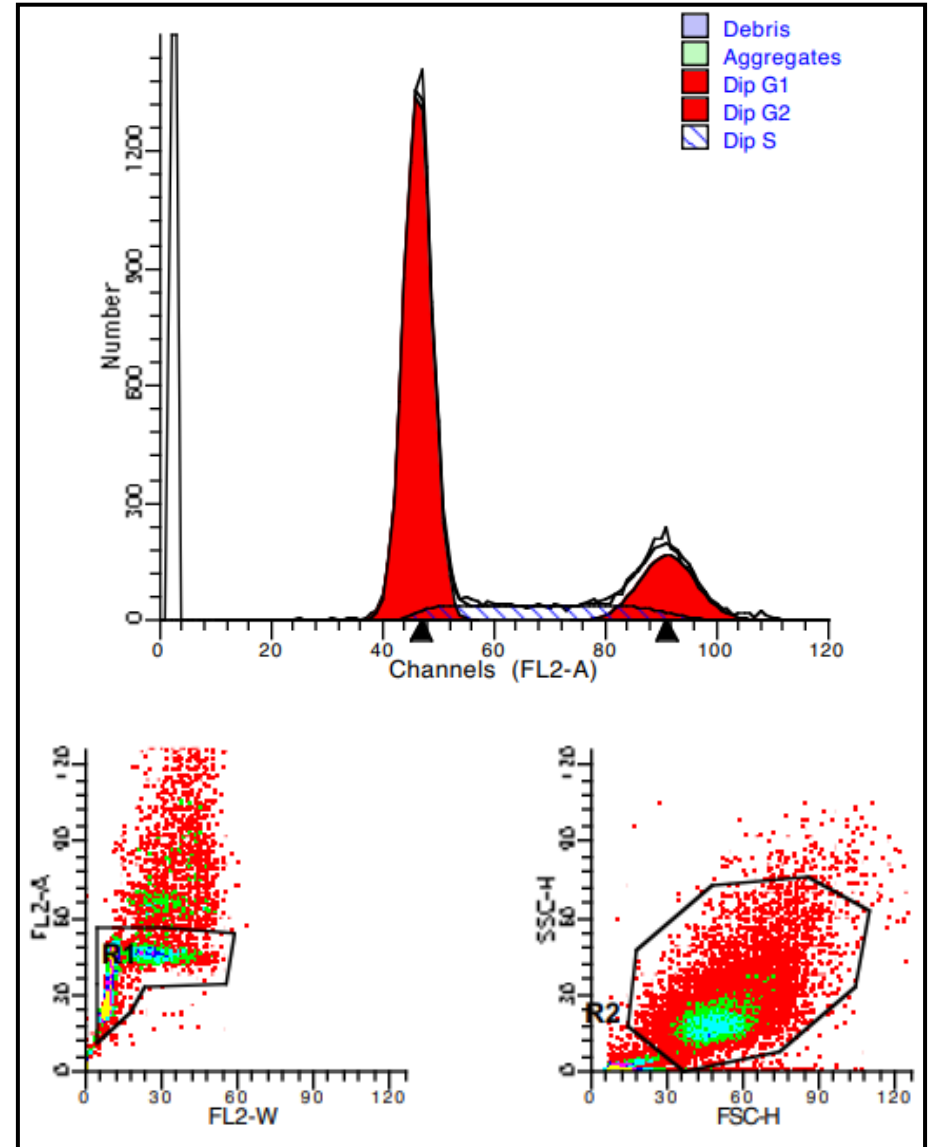

Supplement: fig1-data1 [file elife-64872-fig1-data1-v2.pdf]
