# Supplementary material for: 7,8-Dihydroxyflavone modulates bone formation and resorption and ameliorates ovariectomy-induced osteoporosis
Source: eLife. 2021 Jul 6;10:e64872. doi: 10.7554/eLife.64872 (PMC8285109; doi:10.7554/eLife.64872)
Supplement: Figure 5—source data 1. — The body weight of the rats was recorded weekly during the experimental period. [file elife-64872-fig5-data1.xlsx]

## Sheet: Body weight（g）
Week		1	2	3	4	5	6	7	8	9	10	11	12	13	14
SHAM	1	291	293	305	307	318	323	327	338	351	354	353	360	377	372
	2	288	293	316	316	328	336	338	328	338	350	350	339	359	366
	3	279	279	294	305	305	320	320	350	350	362	379	383	382	388
	4	275	277	301	318	323	325	339	340	345	349	356	369	360	361
	5	279	279	287	300	305	319	320	319	331	344	337	345	348	357
	6	290	297	311	341	336	348	360	345	353	354	350	362	364	381
	7	234	260	281	294	289	312	314	326	339	343	336	351	353	353
OVX	1	253	290	330	350	359	373	377	385	386	390	397	404	405	422
	2	222	251	284	304	317	332	332	340	345	349	360	363	368	371
	3	262	304	360	390	419	442	446	456	460	468	480	484	486	486
	4	228	\	\	\	\	\	\	\	\	\	\	\	\	\
	5	231	267	286	303	310	323	324	326	324	330	342	343	340	341
	6	254	290	328	354	368	380	383	388	393	403	416	421	429	432
	7	249	296	322	346	364	378	390	398	397	407	420	420	423	436
OVX-L	1	262	303	333	356	360	389	400	408	409	416	426	435	397	419
	2	245	286	329	354	359	391	393	392	402	410	424	425	422	439
	3	264	291	317	333	342	356	363	371	374	378	387	394	398	404
	4	225	261	299	334	351	365	376	380	389	398	407	412	405	414
	5	246	285	314	341	352	360	363	373	374	386	396	409	405	415
	6	250	280	304	324	335	351	355	368	368	375	384	400	398	407
	7	245	270	288	304	311	313	312	318	319	322	330	340	336	342
OVX-H	1	213	243	272	298	312	319	328	332	332	342	348	356	353	359
	2	252	279	314	341	347	357	370	374	372	389	394	399	394	408
	3	223	255	290	319	337	356	359	370	383	389	404	405	407	414
	4	228	273	316	335	342	357	364	374	373	383	392	395	392	402
	5	249	280	321	345	361	377	388	392	393	401	406	418	422	435
	6	222	258	293	311	323	337	348	356	362	364	378	388	383	401
	7	249	288	323	350	367	380	390	400	400	408	414	412	421	428
